# Supplementary material for: Synthesis, antibacterial activity and mode of action of novel linoleic acid–dipeptide–spermidine conjugates
Source: Royal Society of Chemistry journal article supplement (doi:10.1039/c2ob26393a), 2012-01-01
Supplement: c2ob26393a.pdf [file c2ob26393a.pdf]

## **ELECTRONIC SUPPLEMENTARY DATA**

### **Synthesis, Antibacterial Activity and Mode of Action of Novel Linoleic acid-di-peptide-Spermidine Conjugates**

Seema Joshi<sup>a,b,1</sup>, Rikeshwer P. Dewangan<sup>a,1</sup>, Shruti Yadav<sup>a</sup>, Diwan S. Rawat<sup>b</sup>, Santosh Pasha<sup>a,\*</sup>

<sup>a</sup>Peptide Research Laboratory, Institute of Genomics and Integrative Biology, Delhi, India.

<sup>b</sup>Department of Chemistry, University of Delhi, Delhi, India.

\*Email: [spasha@igib.res.in](mailto:spasha@igib.res.in)

#### **Table of Contents for the Supplementary data (total 18 pages)**

Page 2-4: HPLC chromatograms of purified sequences **12-19**.

Page 5-16: ESI-HRMS spectra of sequences **1-5, 7, 8** and **10-19**.

Page 17-18: <sup>1</sup>H NMR data for sequences **11, 16, 17, 18** and **19**.

A) RP-HPLC profiles of sequences **12-19** (absorbance at 220 nm). For **12**, **13** and **16**, HPLC gradient of 10 to 90 % buffer 2 was run where, buffer 1 was water (0.05 % TFA) and buffer 2 was acetonitrile (0.05 % TFA) over 45 minutes. For sequences **14-19**, gradient of 30 to 100% buffer 2 was run over 45 minutes where, buffer 1 was water (0.1 % TFA) and buffer 2 was acetonitrile (0.1 % TFA).

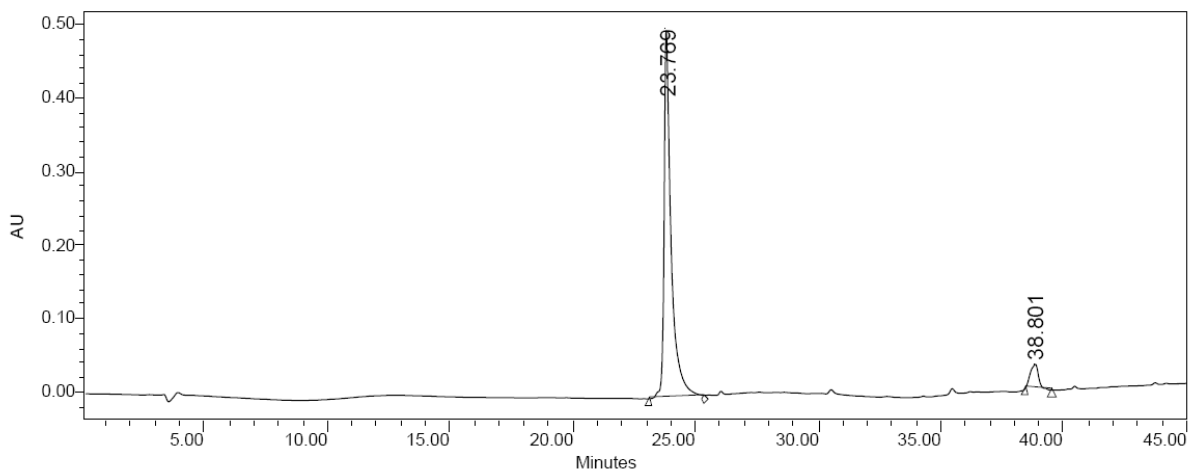

**12**

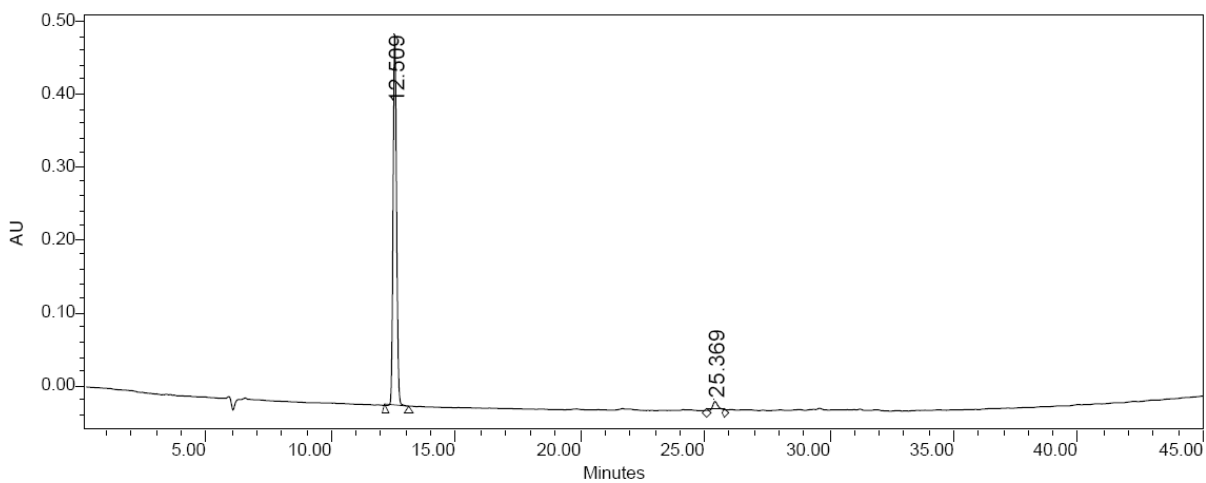

**13**

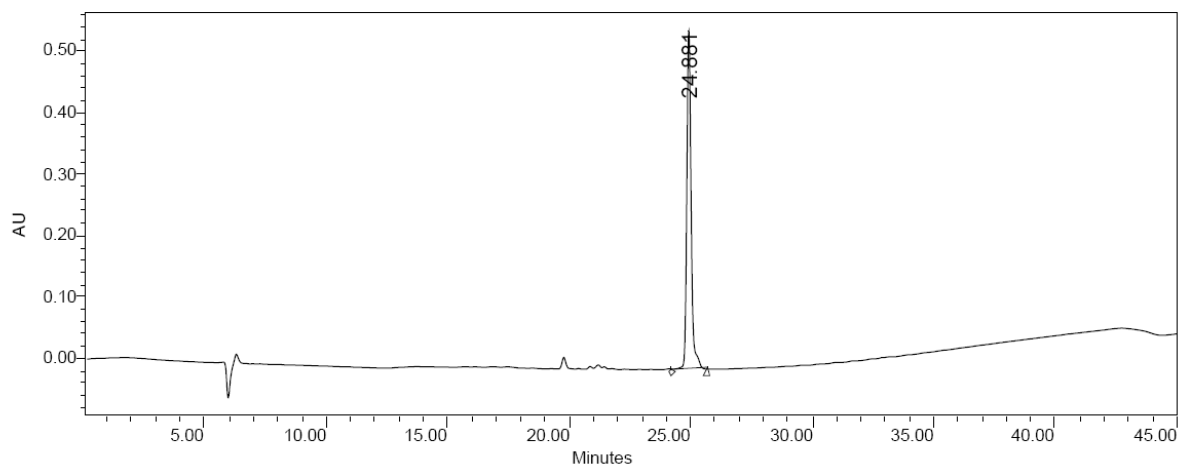

**14**

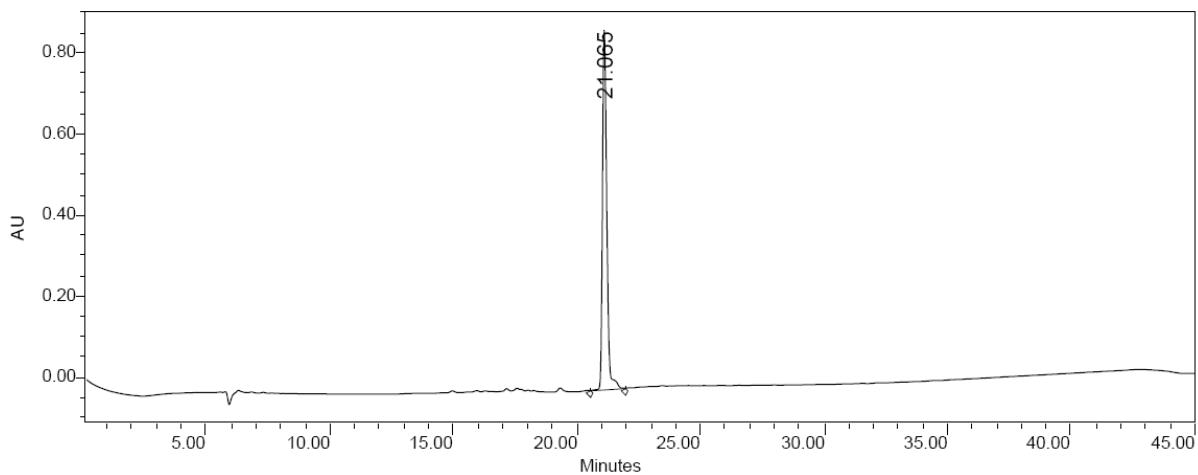

**15**

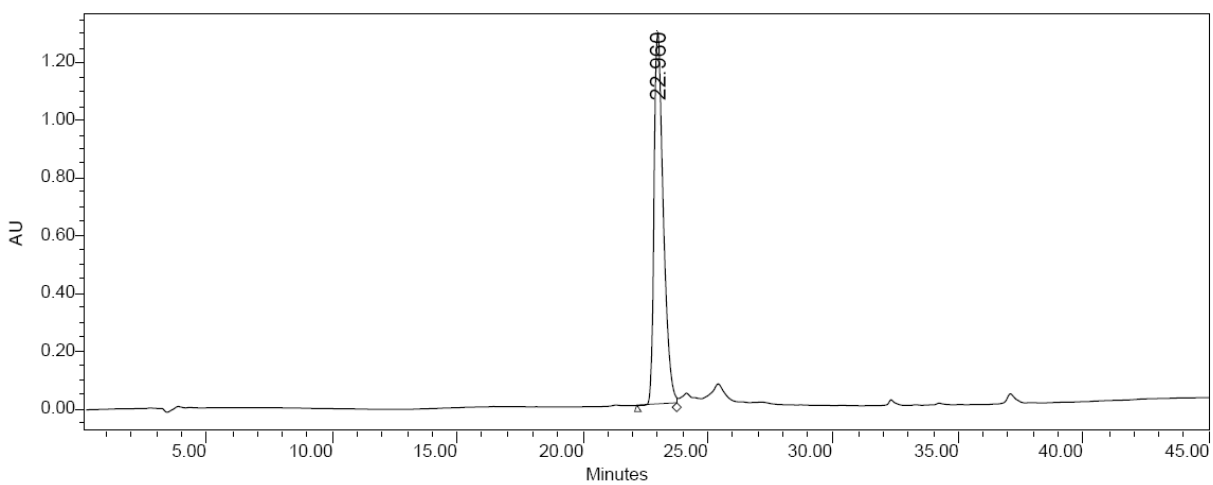

**16**

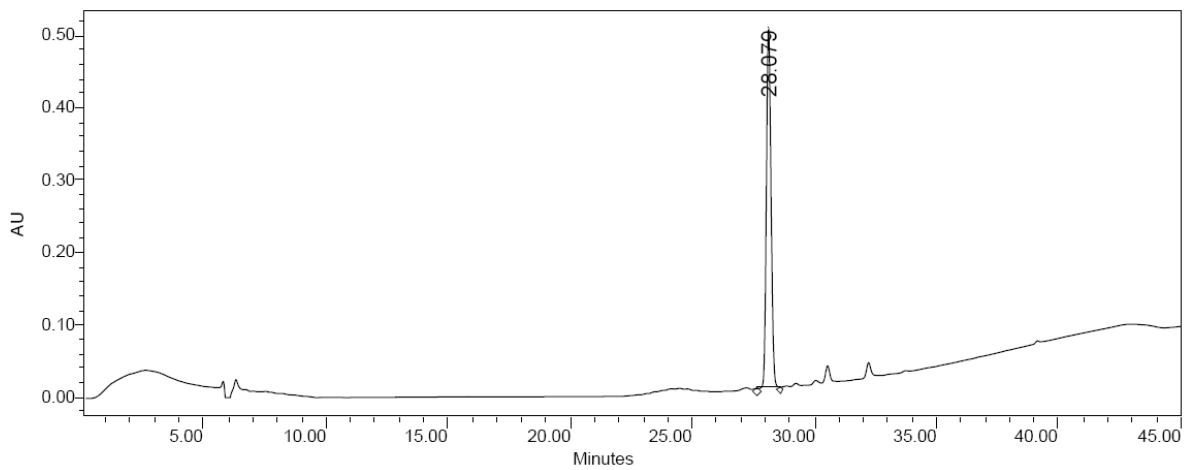

**17**

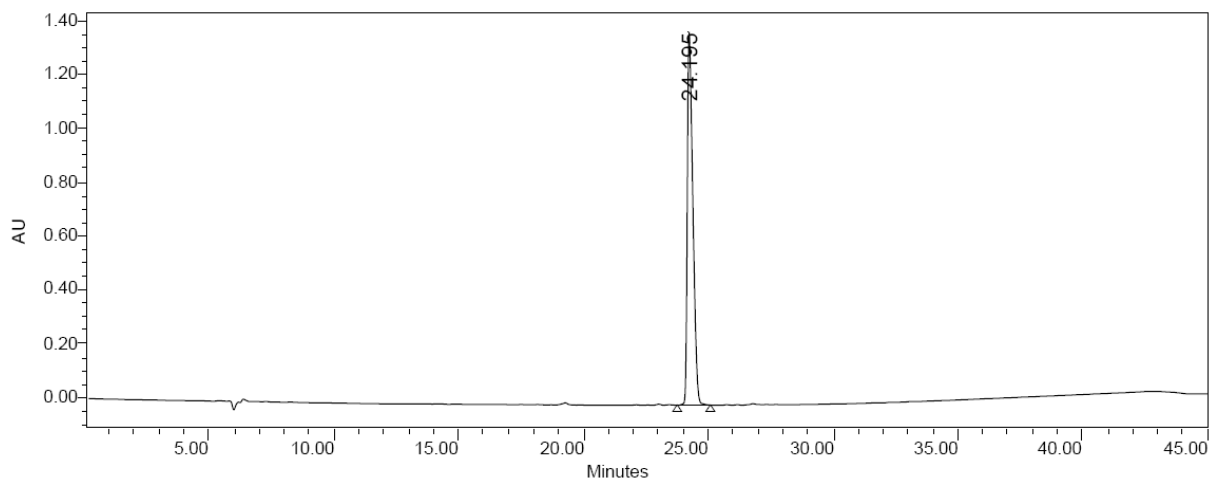

**18**

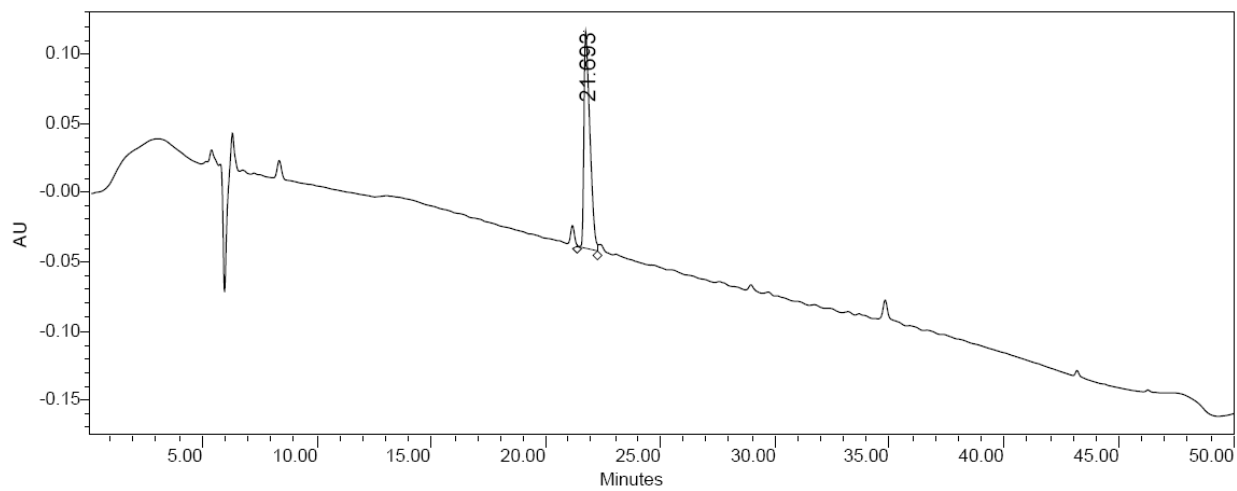

**19**

B) ESI-HRMS spectra of sequences **1-5**, **7**, **8** and **10-19** using LC-ESI-HRMS on UHPLC (Dionex, Germany) and LTQ Orbitrap XL (Thermo Fisher Scientific, USA). The MS data was acquired in positive ion mode at a resolution of 60,000.

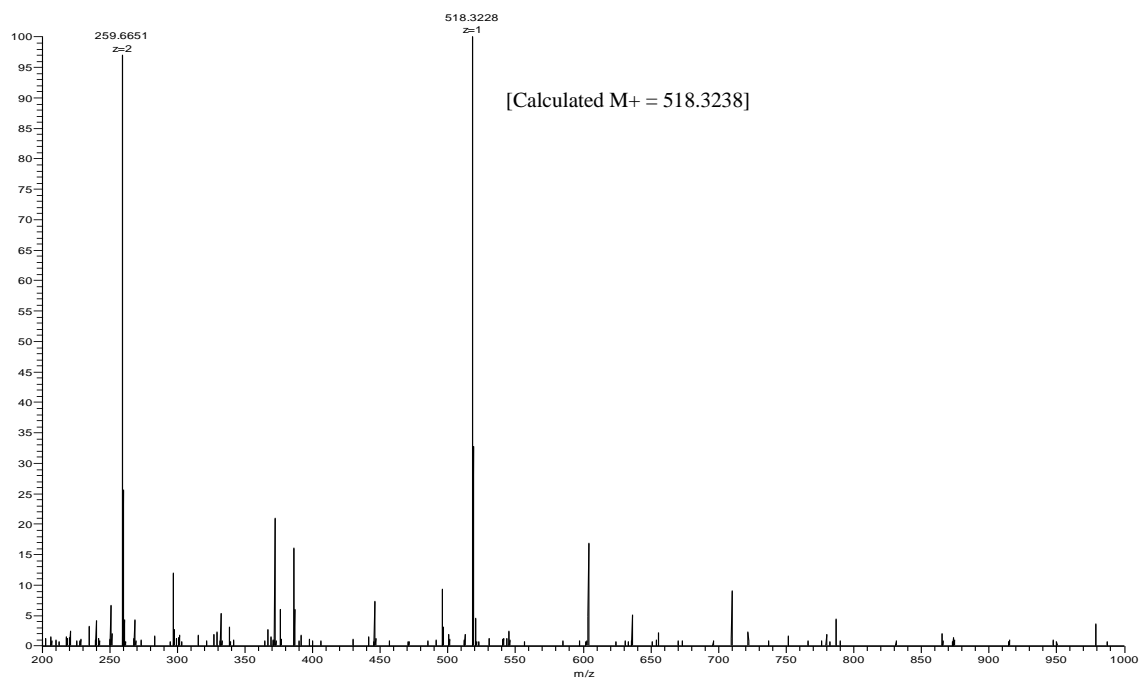

**1**

5

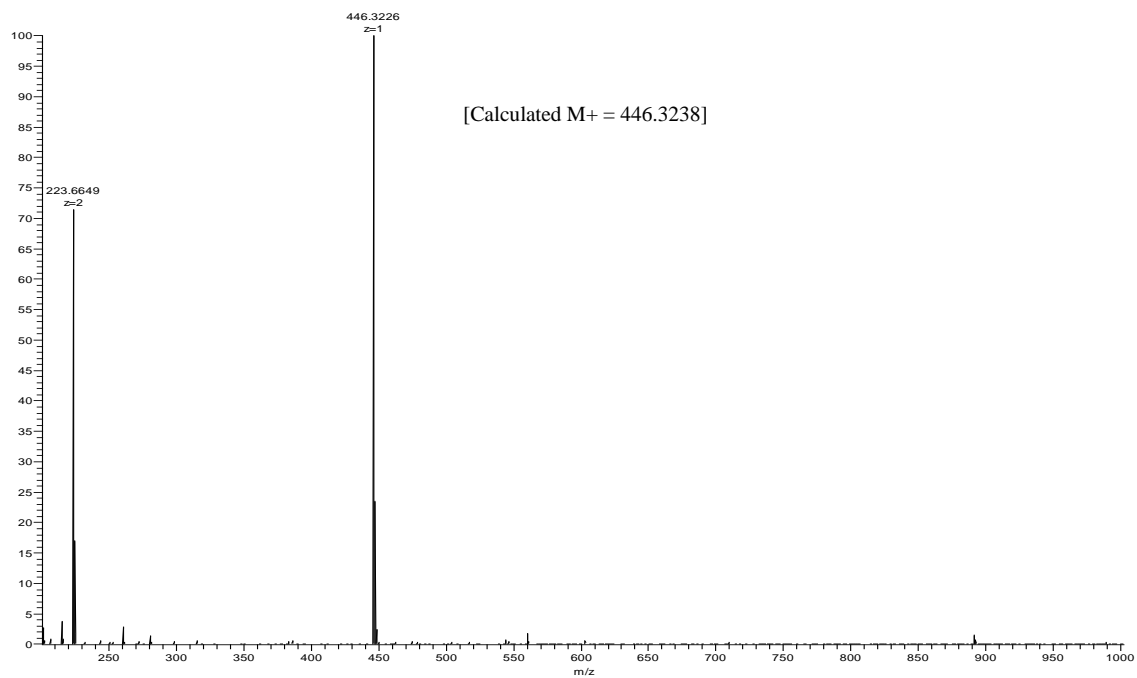

2

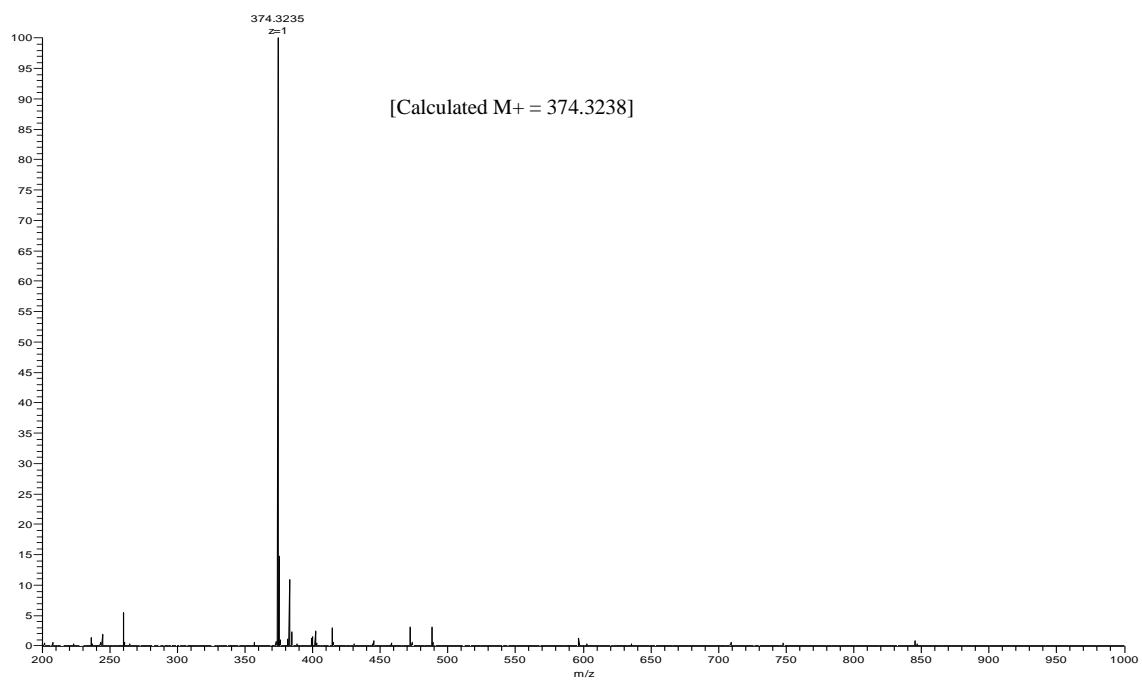

3

6

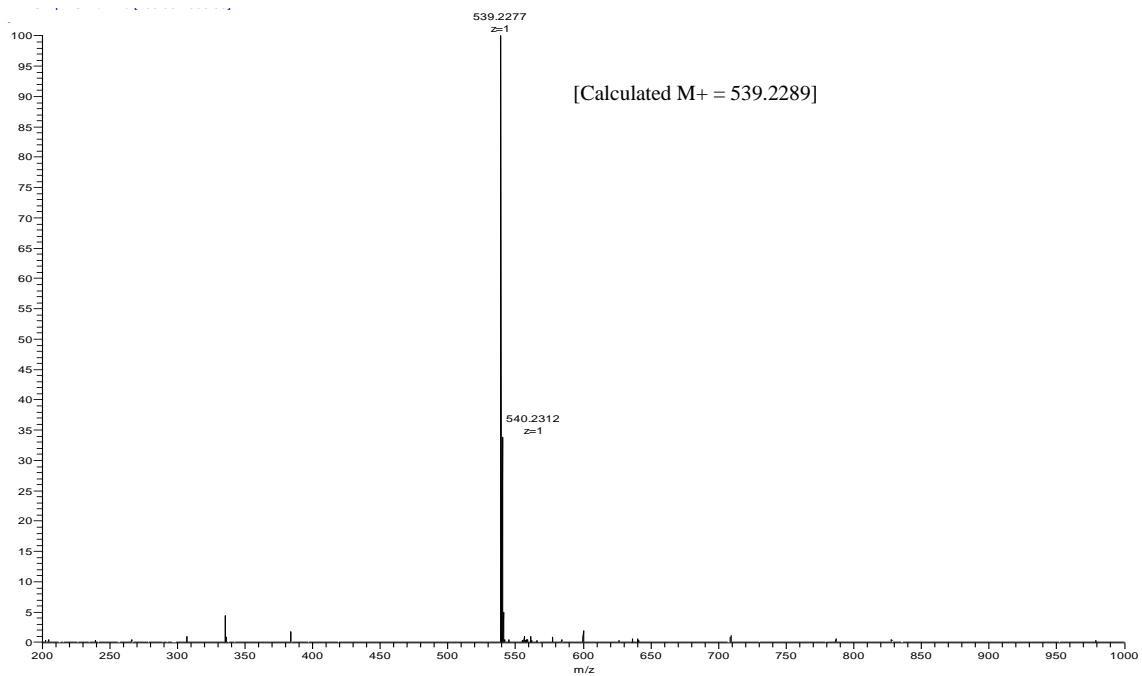

4

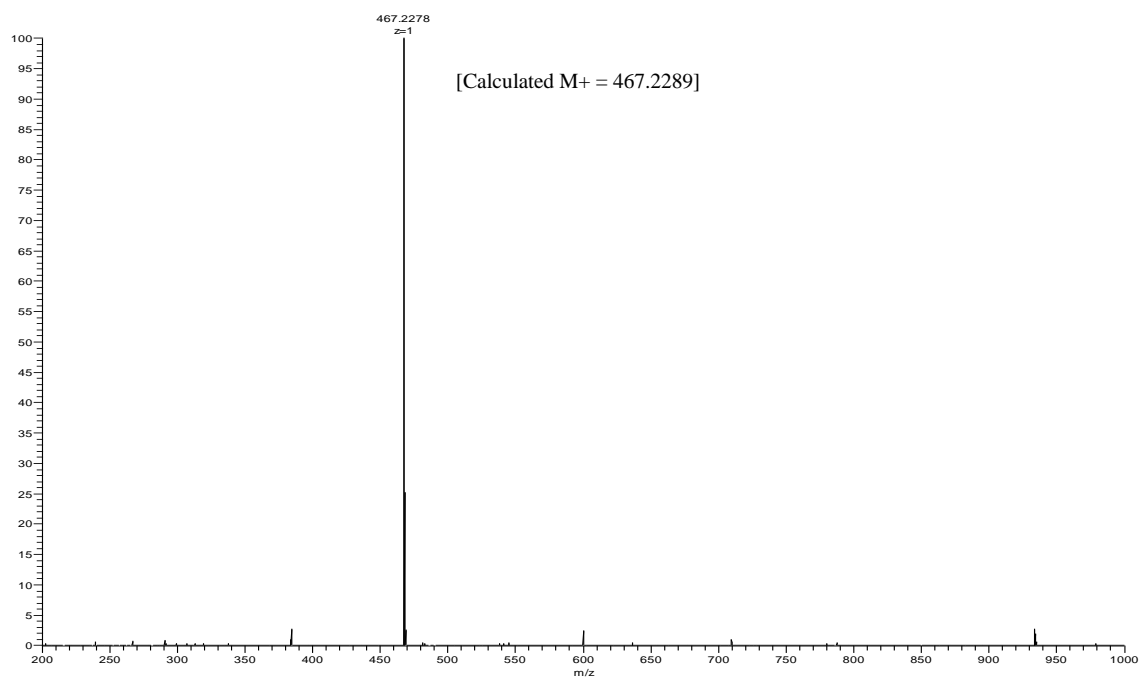

5

7

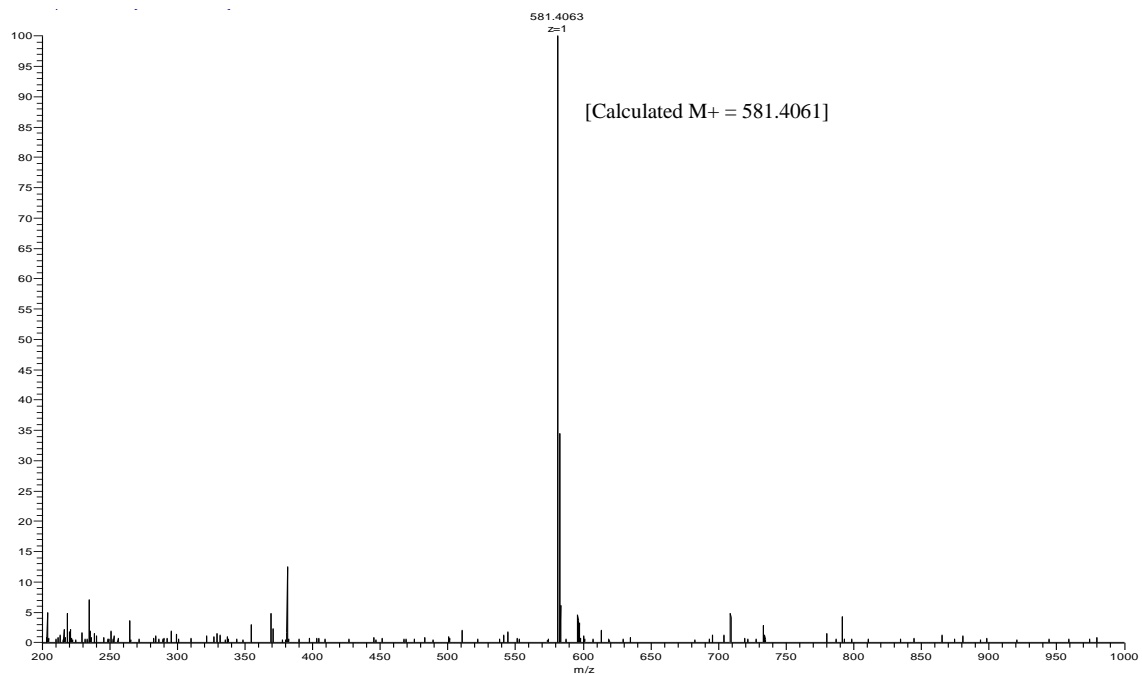

7

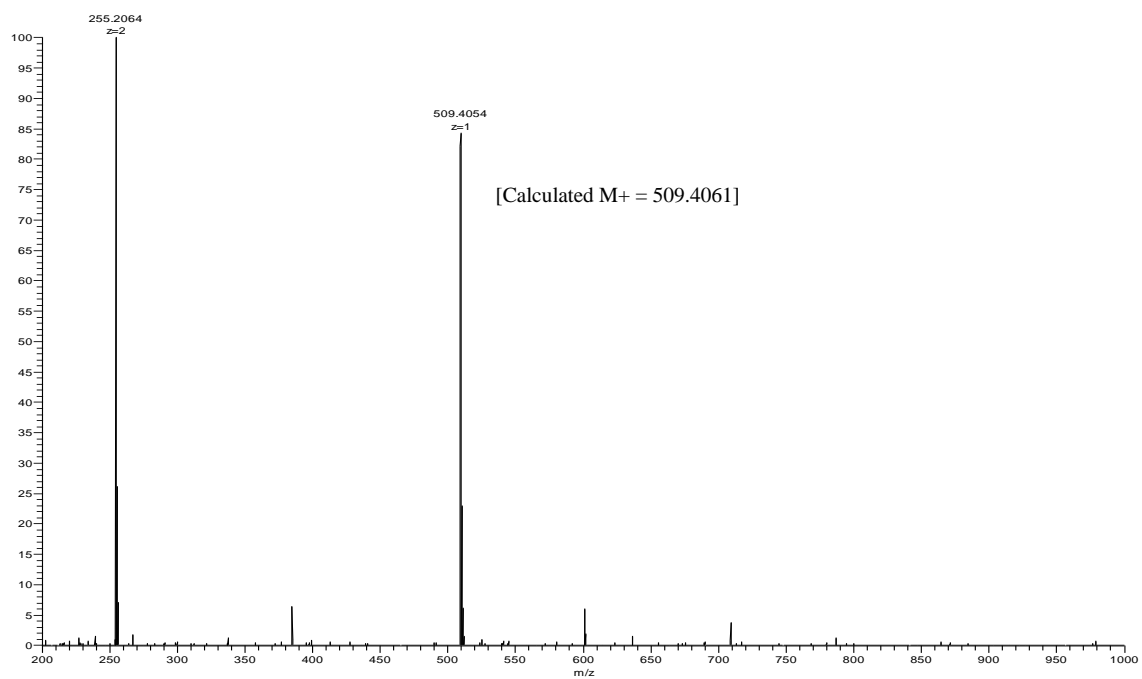

8

8



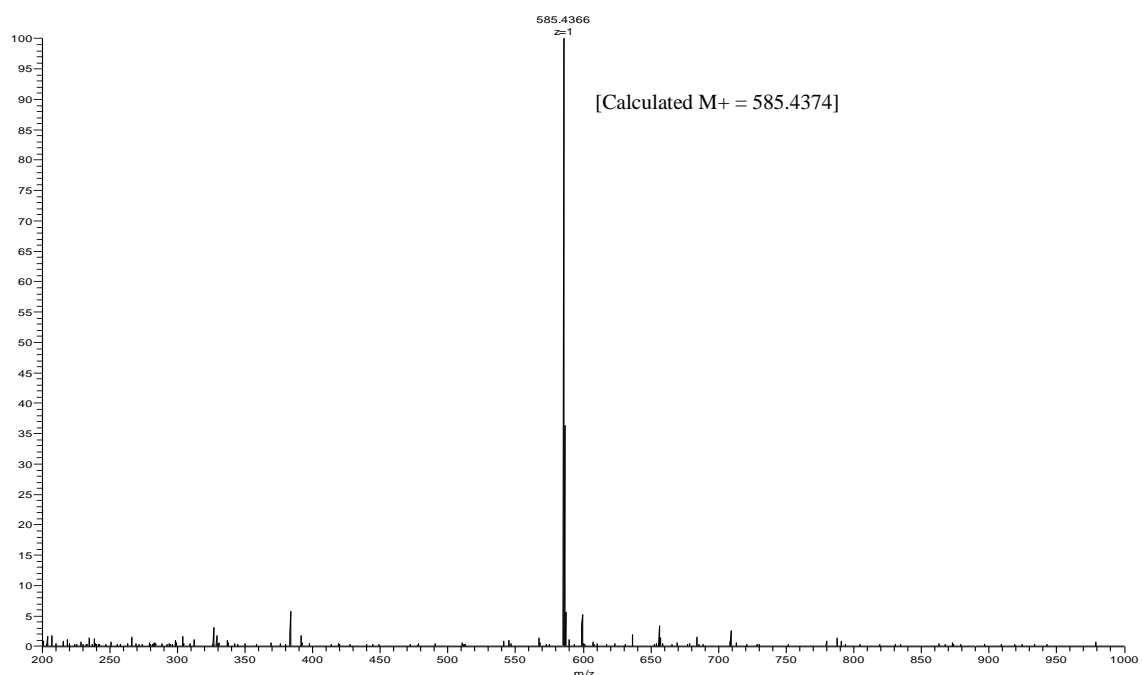

**10**

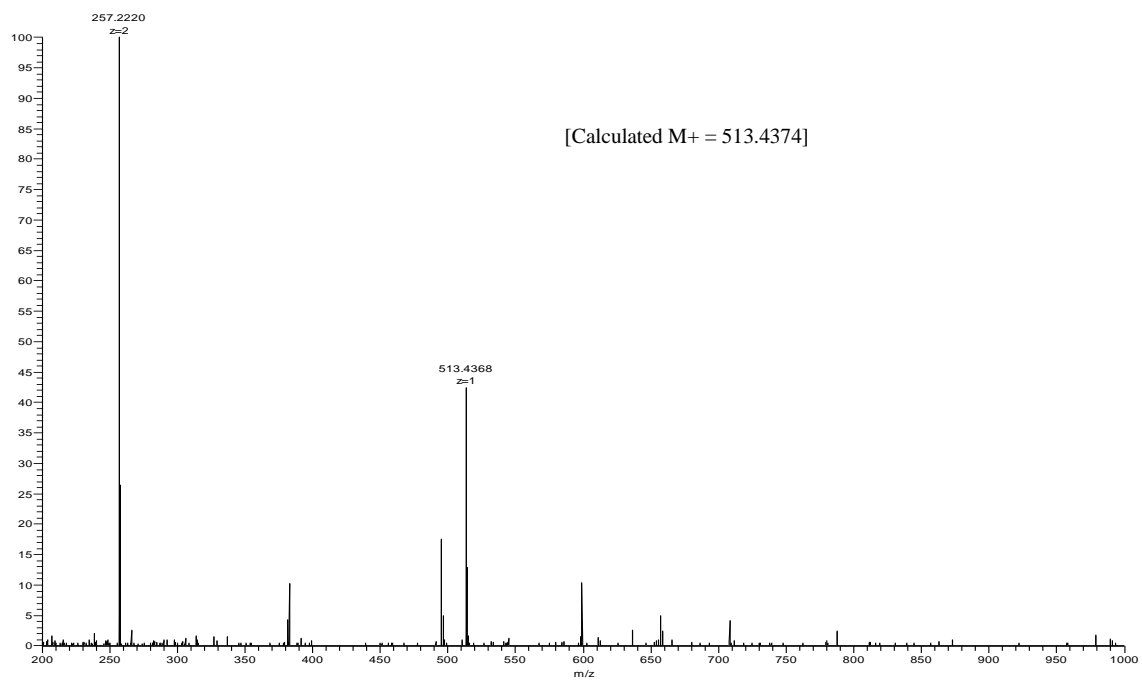

**11**

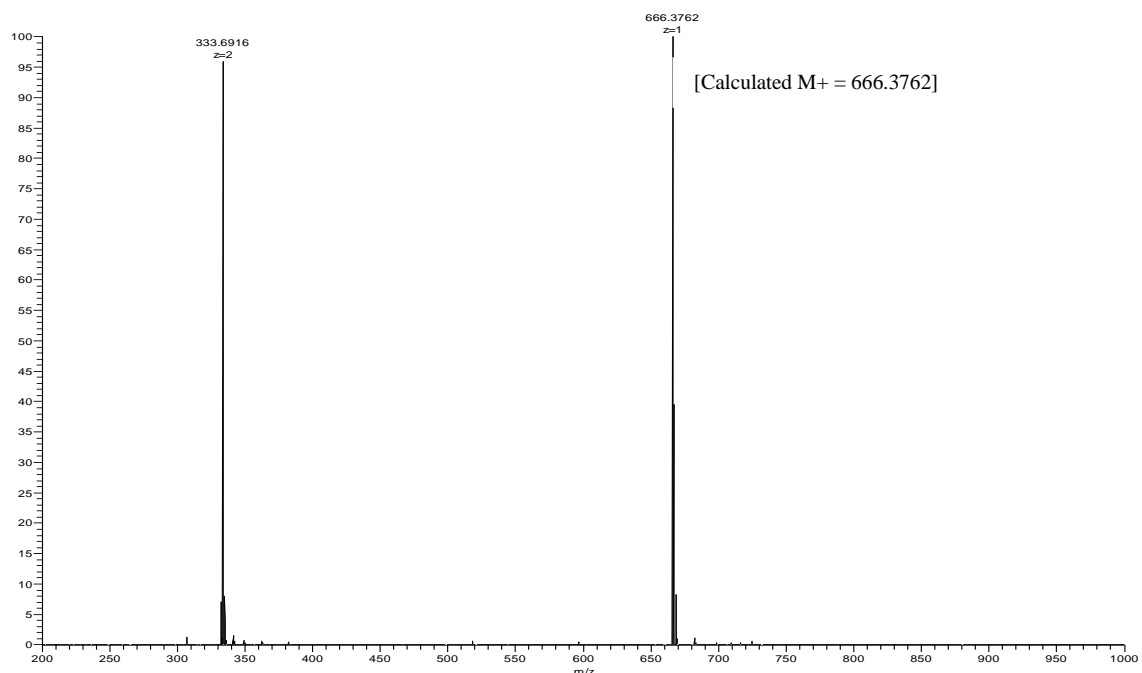

**12**

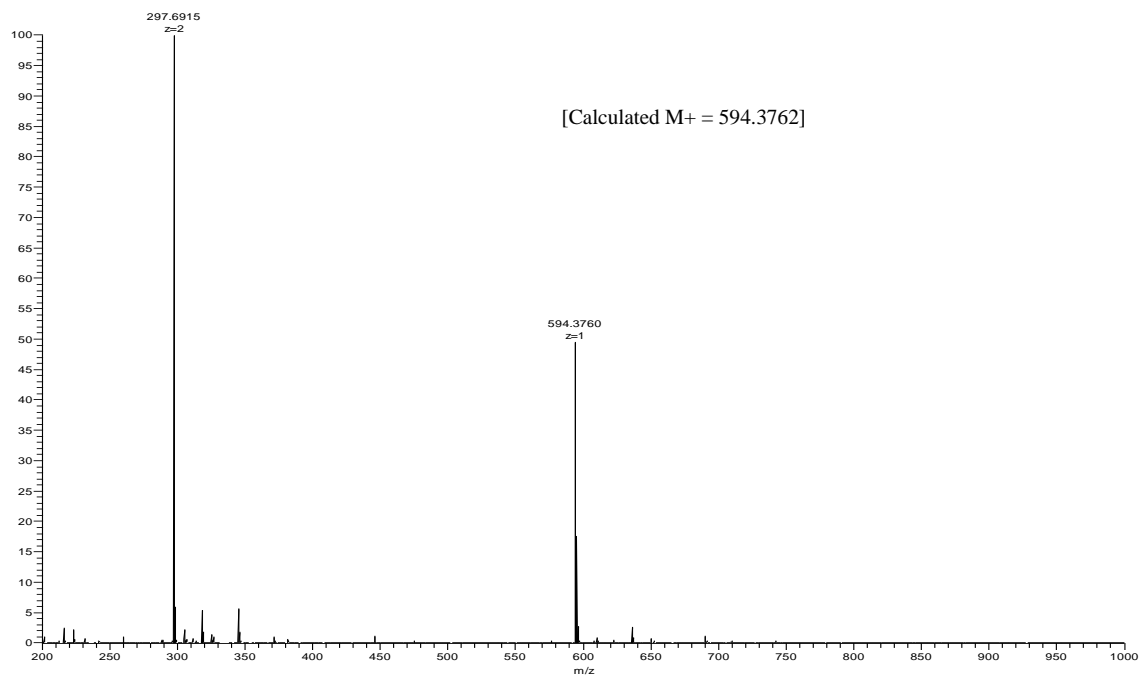

**13**

10

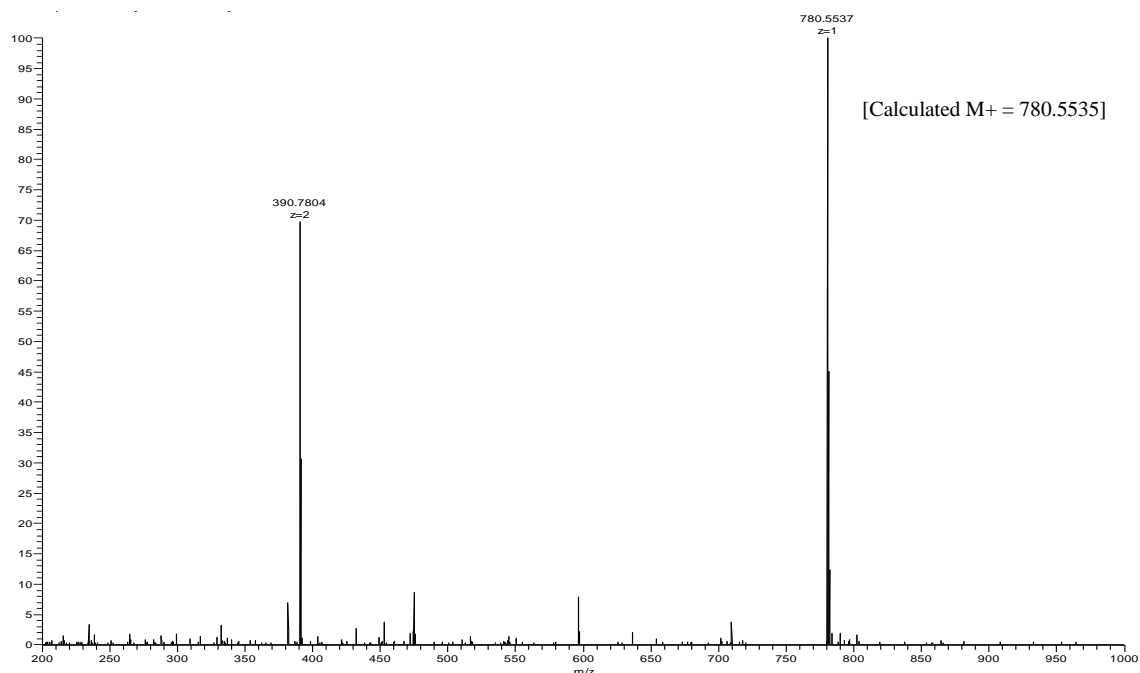

14

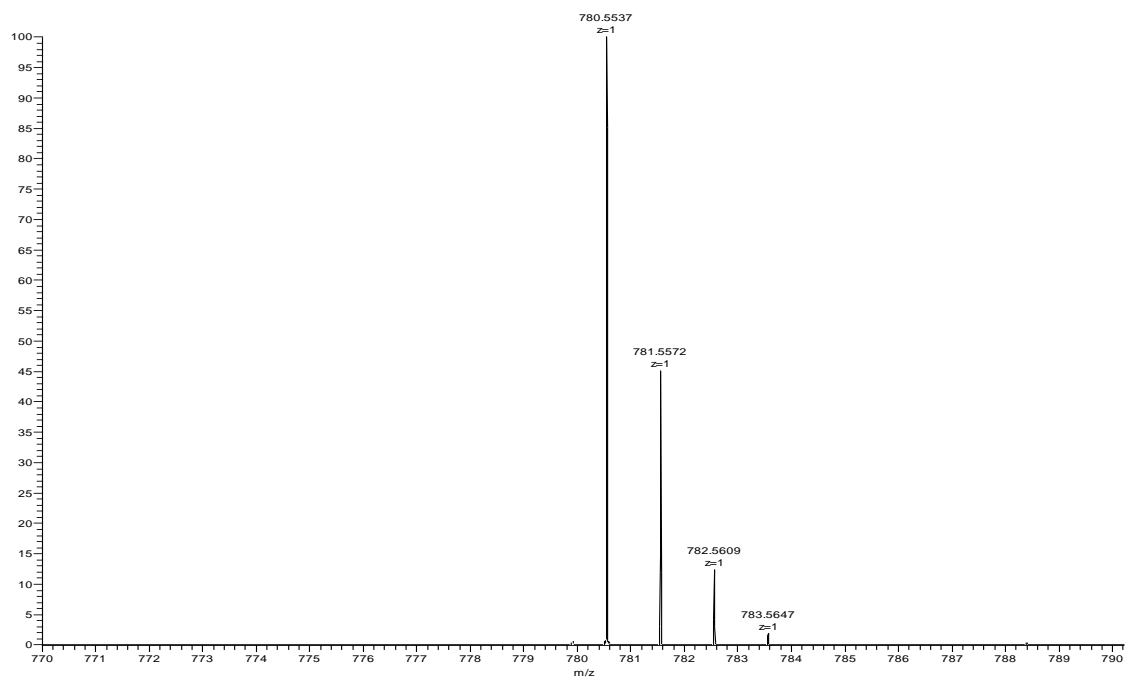

Isotopic peaks for molecular ion peak of 14

11

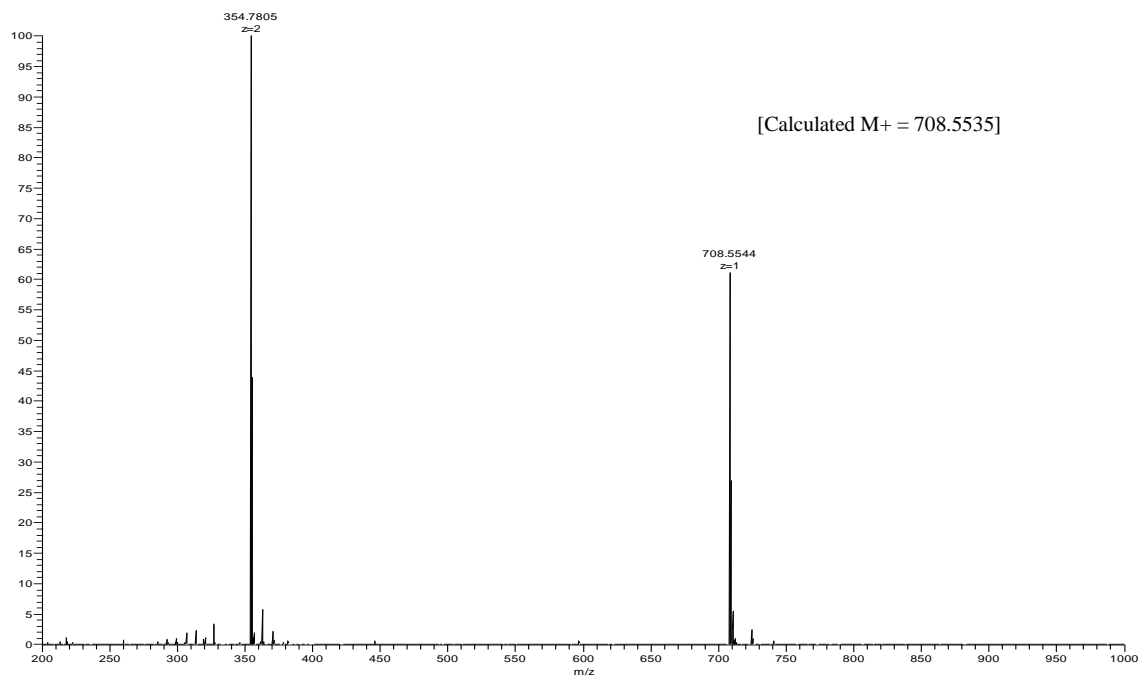

**15**

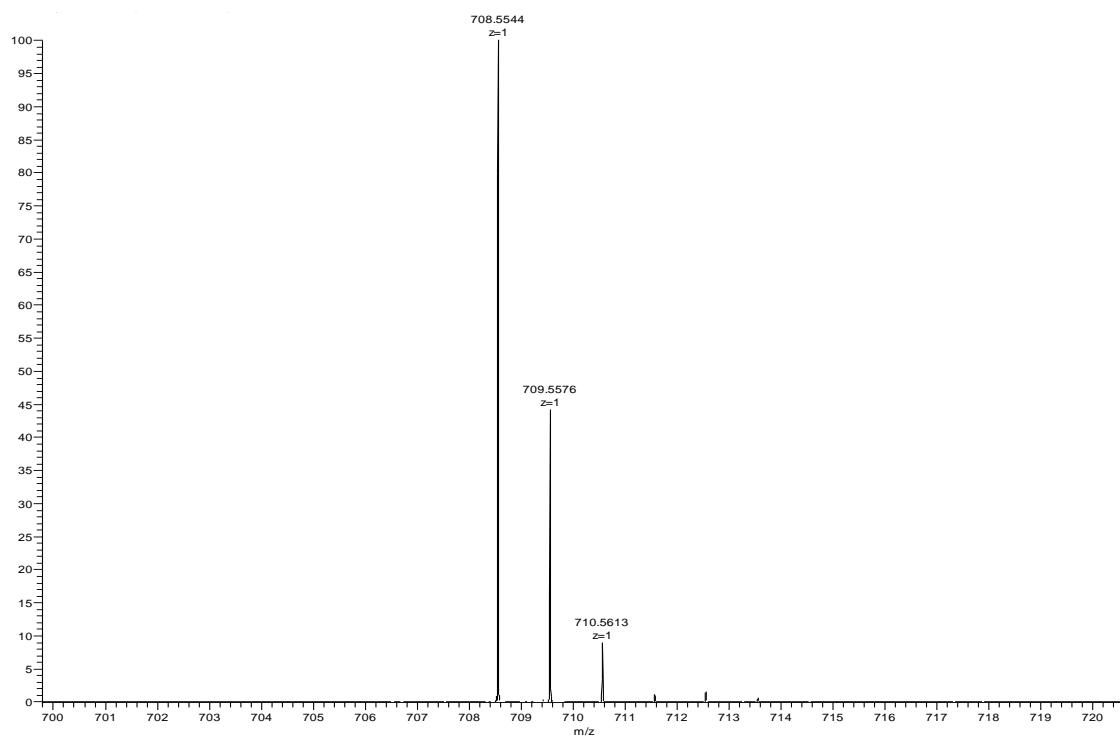

Isotopic peaks for molecular ion peak of **15**

**12**

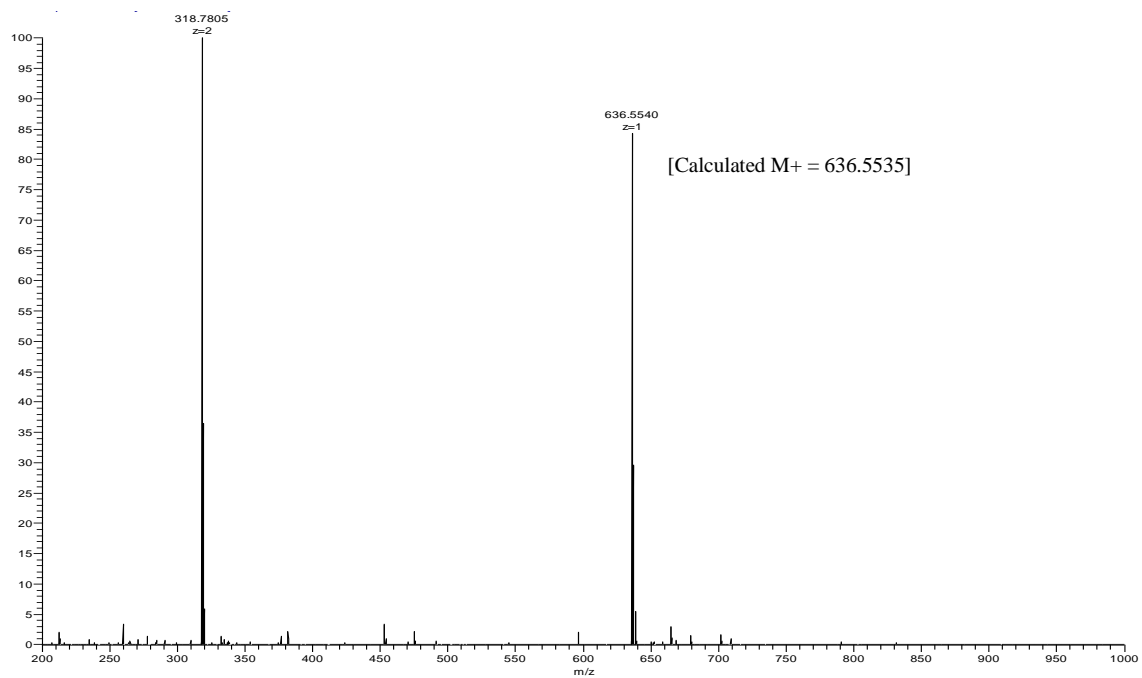

**16**

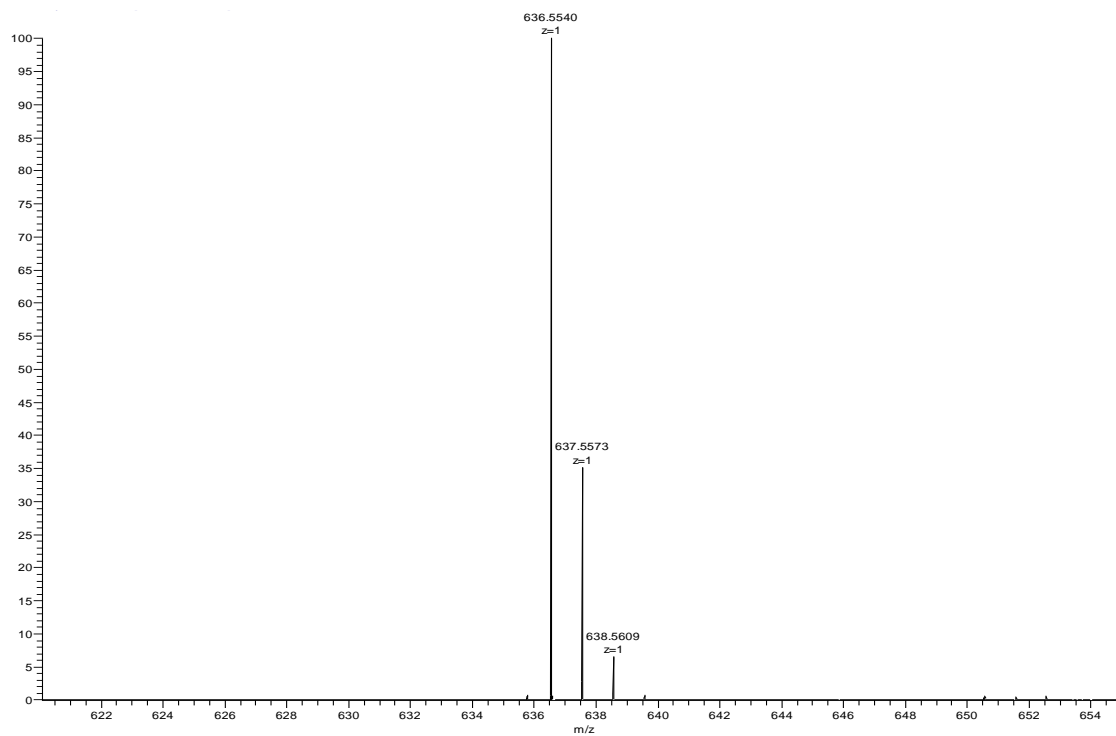

Isotopic peaks for molecular ion peak of **16**

**13**

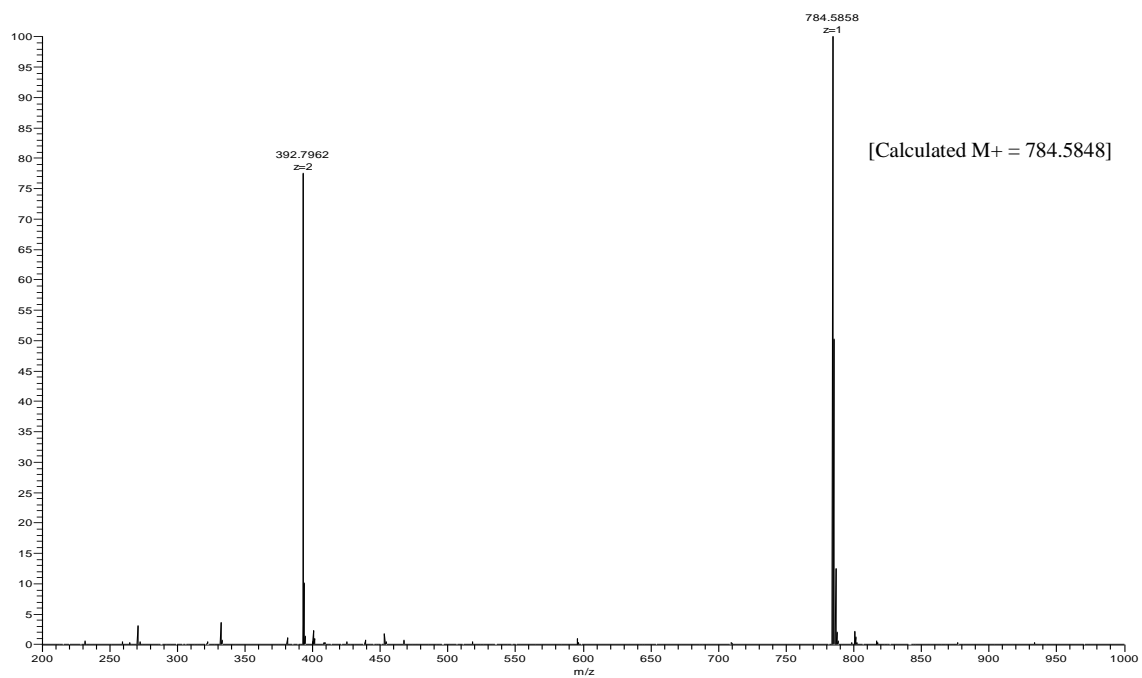

**17**

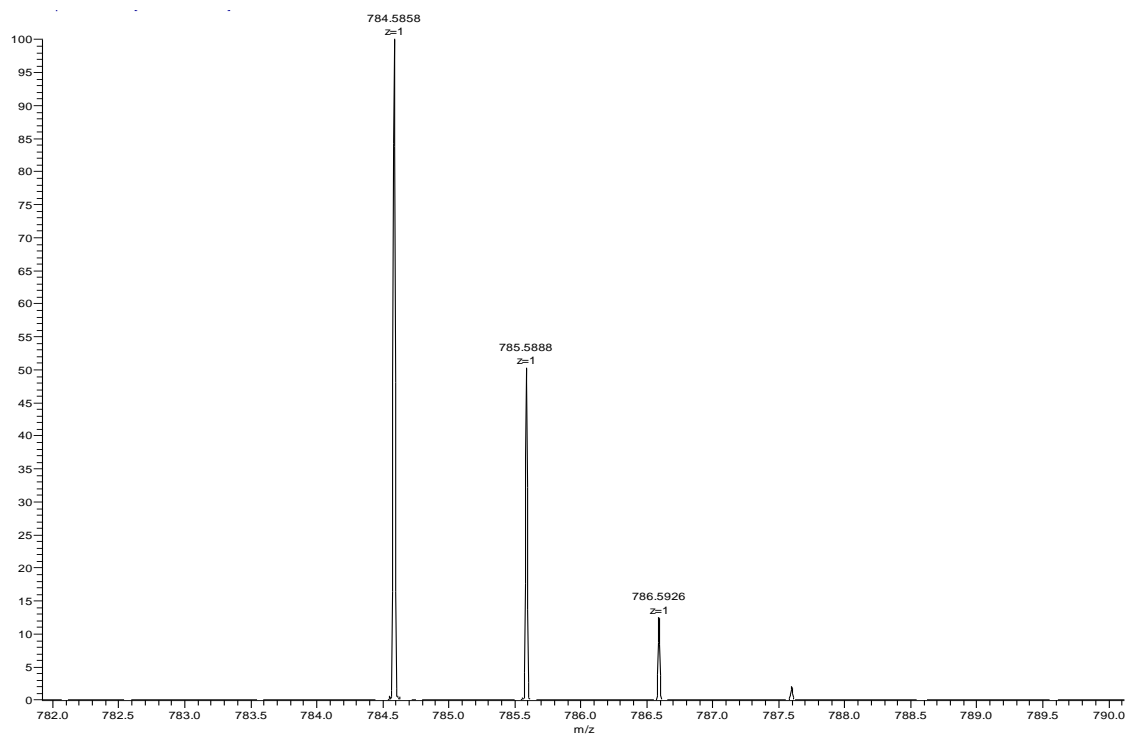

Isotopic peaks for molecular ion peak of **17**

**14**

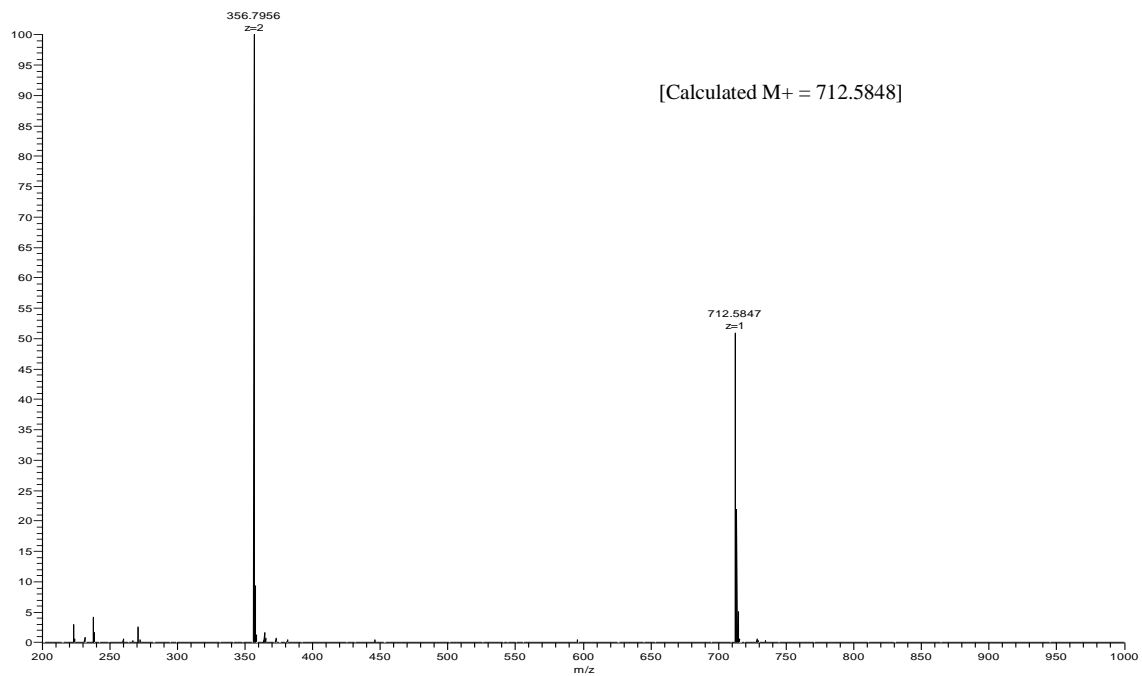

**18**

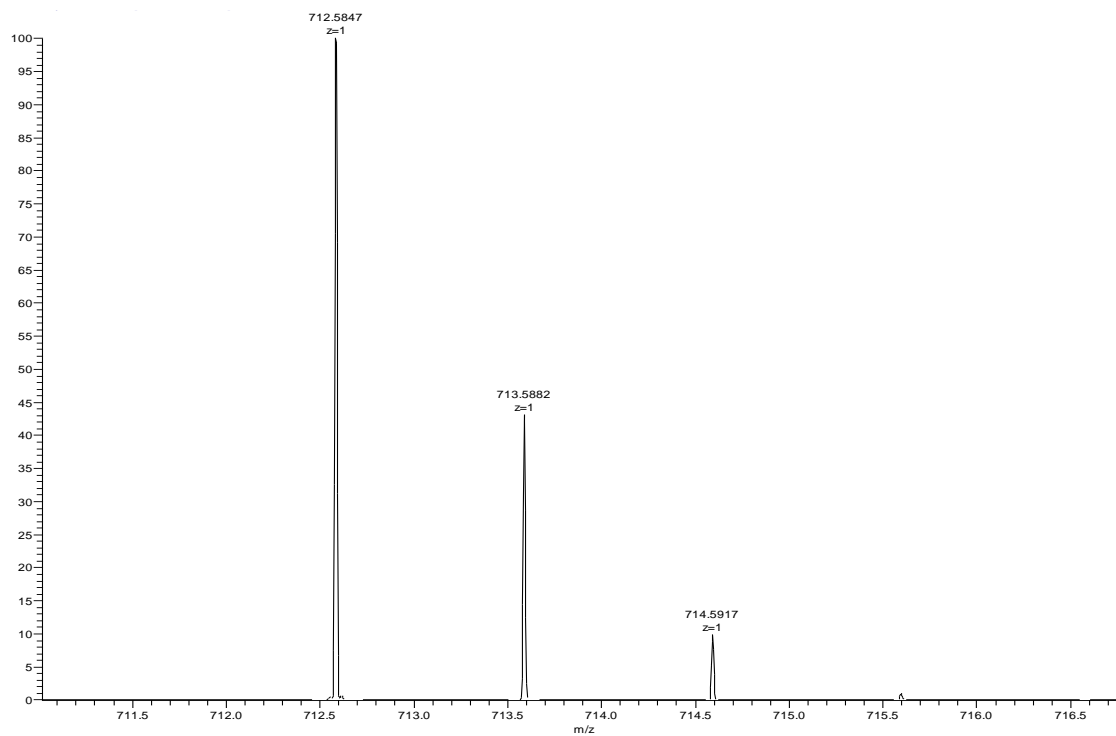

Isotopic peaks for molecular ion peak of **18**

**15**

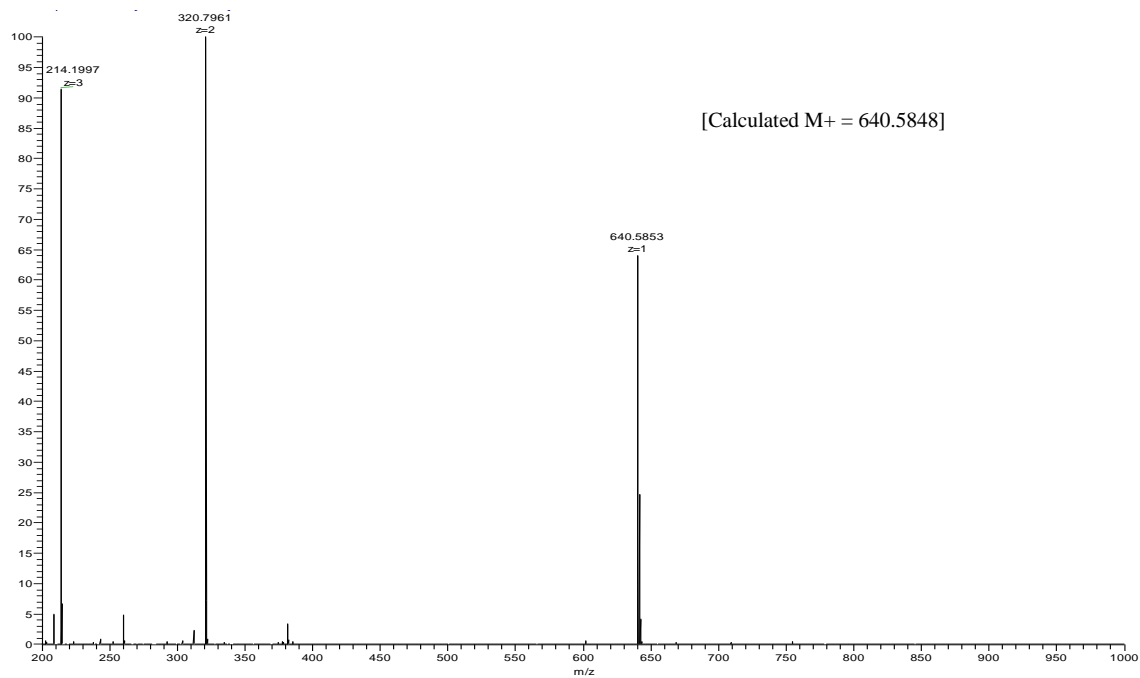

**19**

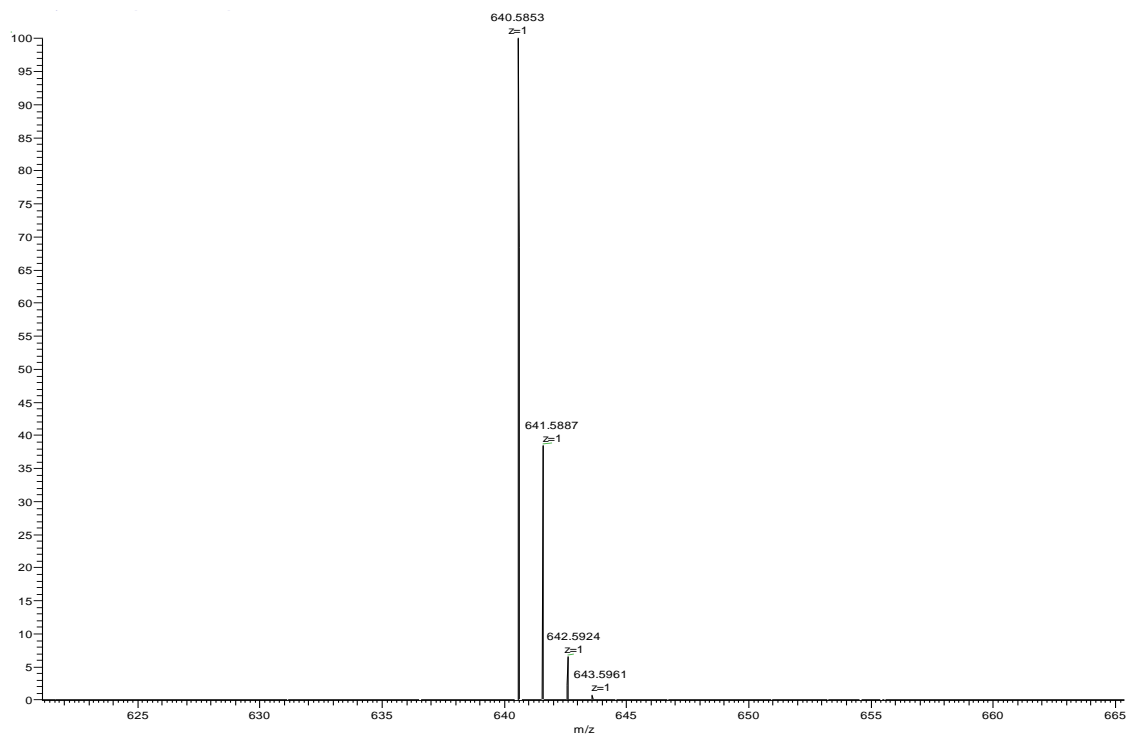

Isotopic peaks for molecular ion peak of **19**

**16**



### C) NMR based characterization

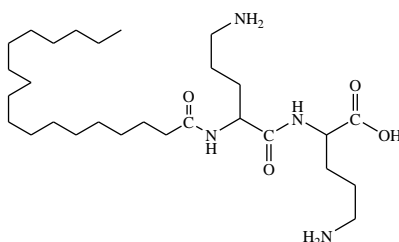

**Sequence 11:**  $[C_{28}H_{56}N_4O_4] \cdot 2CF_3COOH$ ;  $^1H$  NMR (400 MHz,  $DMSO-d_6$ ): 8.04 (d,  $J = 8$  Hz, 1H), 7.96 (d,  $J = 8$  Hz, 1H), 7.78 (brs, 4H), 4.27-4.29 (m, 1H), 4.04-4.05 (m, 1H), 2.75 (brs, 4H), 2.10-2.06 (m, 2H), 1.73-1.67 (m, 2H), 1.57-1.52 (m, 6H), 1.46 (t,  $J = 6.6$  Hz, 2H), 1.25-1.21 (brs, 30H), 0.83 (t,  $J = 6.5$  Hz, 3H).

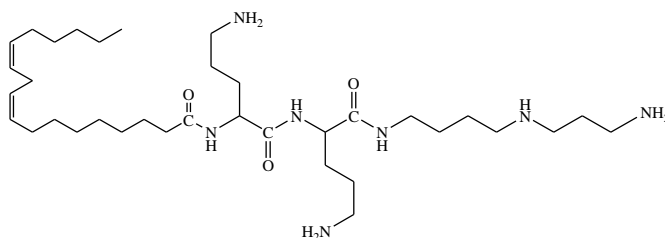

**Sequence 16:**  $[C_{35}H_{69}N_7O_3] \cdot 4CF_3COOH$ ;  $^1H$  NMR (400 MHz,  $DMSO-d_6$ ): 8.72 (brs, 2H), 8.04-8.01 (m, 3H), 7.84 (brs, 9H), 5.34-5.30 (m, 2H), 4.24-4.18 (m, 4H), 3.08-3.05 (m, 2H), 2.97-2.94 (m, 2H), 2.88-2.85 (m, 4H), 2.75-2.70 (brs, 4H), 2.11-2.09 (m, 2H), 2.02-1.97 (m, 2H), 1.91-1.86 (m, 2H), 1.66 (brs, 2H), 1.52-1.44 (m, 8H), 1.44-1.38 (m, 6H), 1.22 (brs, 16H), 0.83 (t,  $J = 6.5$  Hz, 3H).

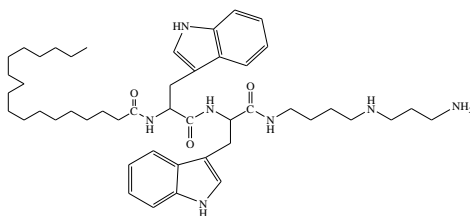

**Sequence 17:**  $[C_{47}H_{73}N_7O_3] \cdot 2CF_3COOH$ ;  $^1H$  NMR (400 MHz,  $DMSO-d_6$ ): 10.8 (brs, 2H), 7.91 (d,  $J = 8$  Hz, 1H), 7.79 (d,  $J = 8$  Hz, 1H), 7.72-7.69 (m, 1H), 7.49 (dd,  $J = 8$  Hz, 2H), 7.29 (d,  $J = 8$  Hz, 2H), 7.06 (d,  $J = 4$  Hz, 2H), 7.04-7.0 (m, 2H), 6.95-6.91 (m, 2H), 4.47-4.41 (m, 2H), 3.02-2.96 (m, 6H), 2.83-2.80 (m, 3H), 2.74 (t,  $J = 7.3$  Hz, 2H), 2.61-2.59 (m, 2H), 1.96 (t,  $J = 7.3$ , 2H), 1.72 (pentet,  $J = 7.3$  Hz, 2H), 1.33-1.29 (m, 2H), 1.27-1.21 (m, 4H), 1.12 (brs, 22H), 1.12-1.05 (m, 6H), 0.98 (d, 4H), 0.83 (t,  $J = 6.5$  Hz, 3H).

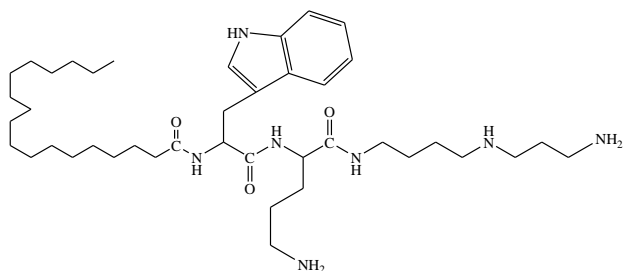

**Sequence 18:**  $[C_{41}H_{73}N_7O_3] \cdot 3CF_3COOH$ ;  $^1H$  NMR (400 MHz, DMSO- $d_6$ ): 10.82 (s, 1H), 8.03 (d,  $J = 8$  Hz, 1H), 7.94 (d,  $J = 7.3$  Hz, 1H), 7.76 (m,  $J = 5.3$  Hz, 1H), 7.55 (d,  $J = 8$  Hz, 1H), 7.29 (d,  $J = 8$  Hz, 1H), 7.1 (s, 1H), 7.03 (t,  $J = 6.6$  Hz, 1H), 6.96-6.92 (m,  $J = 7.3$  Hz, 1H), 4.48 (m, 1H), 4.19 (m, 1H), 3.14-3.12 (m, 2H), 3.10-3.08 (m, 4H), 3.01-2.99 (m, 2H), 2.85-2.81 (m, 4H), 2.76-2.72 (m, 4H), 2.02 (t,  $J = 7.3$  Hz, 2H), 1.79-1.75 (m, 2H), 1.74-1.68 (m, 2H), 1.54-1.44 (m, 4H), 1.39-1.36 (m, 4H), 1.31 (brs, 22H), 1.25-1.21 (m, 6H), 1.14-1.07 (m, 4H), 0.83 (t,  $J = 6.9$  Hz, 3H).

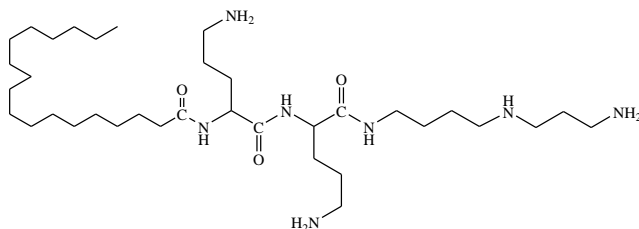

**Sequence 19:**  $[C_{35}H_{73}N_7O_3] \cdot 4CF_3COOH$ ;  $^1H$  NMR (400 MHz, DMSO- $d_6$ ): 7.99-7.97 (m, 3H), 7.82 (brs, 9H), 4.23-4.17 (m, 2H), 3.2 (brs, 2H), 3.07-3.01 (m, 2H), 2.93 (t,  $J = 7.3$  Hz, 2H), 2.87-2.83 (t,  $J = 8$  Hz, 4H), 2.74 (brs, 4H), 2.44 (brs, 2H), 2.11-2.08 (m, 2H), 1.85 (pentet,  $J = 8.0$  Hz, 2H), 1.65 (brs, 2H), 1.51 (brs, 6H), 1.47-1.39 (m, 4H), 1.27-1.21 (brs, 28H), 0.83 (t,  $J = 6.5$  Hz, 3H).
